# Supplementary material
Source: PubMed Central journal article supplement (PMC3811501)
Supplement: AEM.00342-13_zam999104810so1.pdf [file AEM.00342-13_zam999104810so1.pdf]

## **Supplementary Information**

### *Environmental sample collection*

Water was collected from Upper Mystic Lake, (Winchester, MA, ~ 42 26.155N, 71 08. 961W) on Aug, 13, 2008 using a peristaltic pump and plastic Tygon tubing. Tubing was lowered to a point ~1 m from the bottom, running the pump in reverse to prevent water from entering the tubing until the appropriate depth was reached. Water from depth was allowed to flow through the tubing for 5 minutes before 14 mls were collected into a 15 ml sterile falcon tube and immediately placed on dry ice. The first sample was taken from 22m depth and subsequent samples were taken every meter until 3m, then at 1.5m and the surface. Samples were transported on dry ice and stored at -80 °C until processing (about 1 year later).

### *DNA extraction*

DNA was extracted as previously described (Blackburn 2010). Briefly, DNA was extracted with a modified version of the Qiagen DNeasy Blood and Tissue Kit (Qiagen, USA). Water was filtered through Swinnex filter holders onto 0.22 µm filters (Millipore, Billerica, MA). Filters were sterilely cut and added to a 2 ml screw cap tube containing 0.25 g of 0.1 mm zirconium/glass beads (MoBio Laboratories, Inc., Carlsbad, CA). 180 µl of lysis buffer consisting of 20 mM Tris HCl, 2 mM EDTA, and 1.2% Triton-X100 (pH 8.0) was added and samples were placed on a Mini Beadbeater-1 (BioSpec Products, Inc., Bartlesville, OK) for 1 minute at maximum speed. 180 µl of lysis buffer with 40 mg/ml lysozyme was added and the sample was incubated at 37 °C for 1 hr with shaking (450 rpm). 50 µl of proteinase K was added along with 400 µl of AL buffer (Qiagen DNeasy kit) without ethanol. Samples were mixed and incubated at 56 °C for 45 min. followed by a 5 min. incubation at 95 °C. Samples were centrifuged and the liquid was transferred to a sterile 1.5 ml tube. 400 µl of 100% ethanol was added and the liquid was added to the Qiagen DNeasy column. DNA was washed on the column following the Qiagen DNeasy protocol, including 500 µl wash with AW1 and AW2 and a final elution in 100 µl AE.

### *Mock community template preparation*

To make the clone library, 16S rRNA sequences were amplified with Phusion polymerase (New England Biolabs, Ipswich, MA) and 27F and 1492R primers (Lane 1991). PCR products were cloned into the pCR Blunt II plasmid with the Zero Blunt TOPO PCR cloning kit (Invitrogen, Carlsbad, CA) and sequenced in at least one direction with Sanger sequencing (Genewiz, South Plainfield, NJ). Plasmids were purified using the plasmid DNA isolation reagent system (Carolina Biological Supply Co., Burlington, NC) and digested with restriction enzyme NotI (New England Biolabs, Ipswich, MA) to linearize the plasmid.

### *Illumina library preparation*

Real-time PCR reactions were done first to normalize template concentrations and avoid cycling any templates past mid-log phase. PCR reactions for Illumina libraries were carried out as follows: 0.5 units of Phusion with 1 x High Fidelity buffer, 200  $\mu$ M of each dNTP, 0.3  $\mu$ M of PE16S\_V4\_U515\_F and PE16S\_V4\_E786\_R first step primers and approximately 40 ng of mixed DNA template were added for each 25  $\mu$ l reaction. Additionally, 5 X SYBR Green I nucleic acid stain (Molecular Probes, Eugene, OR) was added for real-time PCR. Samples were cycled with the following conditions: denaturation at 98 °C for 30 sec annealing at 52 °C for 30 sec and extension at 72 °C for 30 sec. 14 cycles was mid-log for all samples and was subsequently used as the number of cycles for the first step PCR. The first step PCR reaction was cycled as four 25  $\mu$ l reactions for each sample. PCR reactions were pooled and cleaned with Agencourt AMPure XP- PCR purification (Beckman Coulter, Brea, CA) according to the manufacture's protocol.

Illumina specific adaptors were added during a second step amplification. The conditions for the second step PCR were similar to the first step, although 4  $\mu$ l of the purified first step reaction was used as a template and 0.4  $\mu$ M of each PE-III-PCR-F and the barcoded reverse primer was used with 9 cycles. Samples were cycled as four 25  $\mu$ l reactions and cleaned with Agencourt AMPure XP- PCR purification system. The nine libraries were sequenced in groups of three across three lanes (two flow cells) on both the Illumina GA II and HiSeq at the Biomicro

Center (MIT, Cambridge, MA) with 93 other samples per lane.

#### *Calculation of error rate per sample*

Raw data from reads with an exact match to one of the nine barcodes used for this experiment were used for comparing error rates across flow cells and lanes. This was necessary because these samples were multiplexed into lanes containing up to 93 additional unrelated samples. The raw, unfiltered fastq files were converted into a fasta file using a custom perl script. Blast was used to map the raw sequences to the mock community members, where the mock community database was trimmed to the amplified region between, but not including, the forward and reverse primer site. Raw sequences were only considered if the query and subject start and stop positions corresponded to the full length of the Illumina forward read. The perfect match, and single and double base mismatches, taken from the blast output, were calculated as a percent of the total that map to the full length Illumina sequence (Fig. S6). Sequences with less than 100% query or subject coverage were not considered in this calculation.

#### *Commands used during processing*

The following commands were used during processing.

##### Closed-reference clustering with QIIME (Shell):

```
#!/bin/sh
```

```
#$ -S /bin/bash
```

```
# -cwd
```

```
source /etc/profile.d/modules.sh
```

```
module load qiime-default
```

```
module load mothur
```

```
#fasta file name in QIIME format from first string after command
```

```
FASTAFILE=$1
```

```
#output directory as second string after command
```

```
OUTPUT=$2
```

```
#reference fasta file (latest greengenes OTUS)
REFERENCEFA~/greengenes/gg_12_10_otus/rep_set/97_otus.fasta
#reference taxonomies
REFERENCETAX=~/greengenes/gg_12_10_otus/taxonomy/97_otu_taxonomy.txt
PARAMS~/bin/methods_scripts/closed_ref_params.txt
```

```
echo "Start time"
date +"%m-%d-%y"
date +"%T"
```

```
pick_reference_otus_through_otu_table.py -o ${OUTPUT} -i ${FASTAFILE} -r
${REFERENCEFA} -t ${REFERENCETAX} -p ${PARAMS}
```

```
pick_rep_set.py --input ./${OUTPUT}/uclust_ref_picked_otus/*_otus.txt --
rep_set_picking_method most_abundant --fasta_file ${FAST
AFILE} -o ./${OUTPUT}/uclust_ref_picked_otus/otus_rep_set.fa
```

```
echo "End time"
date +"%m-%d-%y"
date +"%T"
```

#### Closed-reference QIIME parameters:

```
pick_otus:otu_picking_method uclust_ref
pick_otus:refseqs_fp /greengenes/gg_12_10_otus/rep_set/97_otus.fasta
pick_otus:enable_rev_strand_match True
pick_otus:suppress_new_clusters True
```

#### Open-reference clustering with QIIME (shell)

```
#!/bin/sh
#$ -S /bin/bash
```

```
# -cwd

source /etc/profile.d/modules.sh
module load qiime-default
module load mothur
#fasta file name in QIIME format
FASTAFILE=$1
#output folder (unique)
OUTPUT=$2
#reference fasta file (latest greengenes OTUS)
REFERENCEFA=/data/spacocha/Qiime_dir/greengenes/gg_12_10_otus/rep_set/97
_otus.fasta
#reference taxonomies
REFERENCETAX=/data/spacocha/Qiime_dir/greengenes/gg_12_10_otus/taxonomy
/97_otu_taxonomy.txt
PARAMS=/home/spacocha/bin/methods_scripts/open_ref_params.txt

echo "Start time"
date +"%m-%d-%y"
date +"%T"

pick_reference_otus_through_otu_table.py -o ${OUTPUT} -i ${FASTAFILE} -r
${REFERENCEFA} -t ${REFERENCETAX} -p ${PARAMS}

pick_rep_set.py --input ./${OUTPUT}/uclust_ref_picked_otus/*_otus.txt --
rep_set_picking_method most_abundant --fasta_file ${FAST
AFILE} -o ./${OUTPUT}/uclust_ref_picked_otus/otus_rep_set.fa

echo "End time"
date +"%m-%d-%y"
```

```
date +"%T"
```

#### Open-reference QIIME parameters:

```
pick_otus:otu_picking_method uclust_ref  
pick_otus:refseqs_fp greengenes/gg_12_10_otus/rep_set/97_otus.fasta  
pick_otus:enable_rev_strand_match True  
pick_otus:suppress_new_clusters False
```

#### De novo USEARCH (shell)

```
#!/bin/sh  
#$ -S /bin/bash  
# -cwd
```

```
#fastfile  
FASTAFILE=$1  
#matfile  
MATFILE=$2
```

```
echo "Start time"  
date +"%m-%d-%y"  
date +"%T"
```

```
perl ~/bin/fasta2uchime_mat.pl ${MATFILE} ${FASTAFILE} > ${FASTAFILE}.ab  
~/bin/usearch6.0.307_i86linux32 -cluster_fast ${FASTAFILE}.ab -id 0.97 -uc  
${FASTAFILE}.uc  
perl ~/bin/UC2list2.pl ${FASTAFILE}.uc > ${FASTAFILE}.list  
perl ~/bin/list2mat.pl ${MATFILE} ${FASTAFILE}.list eco > ${FASTAFILE}.list.mat  
perl ~/bin/fasta2filter_from_mat.pl ${UNIQUE}.list.mat ${FASTAFILE} >  
${FASTAFILE}.list.mat.fa
```

```
echo "End time"  
date +"%m-%d-%y"  
date +"%T"
```

#### Mothur command (batch)

```
unique.seqs(fasta=unique.uchime.remove.tocluster.fa)  
align.seqs(fasta=unique.uchime.remove.tocluster.unique.fa,  
reference=/data/spacocha/tmp/silva.bacteria.fasta)  
screen.seqs(fasta=unique.uchime.remove.tocluster.unique.align,  
name=unique.uchime.remove.tocluster.names, start=13862,  
end=15958,minlength=76)  
filter.seqs(fasta=unique.uchime.remove.tocluster.unique.good.align, vertical=T,  
trump=.)  
unique.seqs(fasta=unique.uchime.remove.tocluster.unique.good.filter.fasta,  
name=unique.uchime.remove.tocluster.good.names)  
system(cp unique.uchime.remove.tocluster.unique.good.filter.unique.names  
final.names)  
system(cp unique.uchime.remove.tocluster.unique.good.filter.names final.names)  
dist.seqs(fasta=final.fasta, cutoff=0.15)  
cluster(column=final.dist, name=final.names)
```

#### *Generation of principal component analysis plots*

Principal component analysis was done on the final OTU by library matrices for each clustering algorithm using QIIME beta\_diversity\_through\_plots.py. The lowest number of sequences in a library was determined using QIIME's per\_library\_stats.py and input into beta\_diversity\_through\_plots.py (-e). Trees of the representative samples were made with FastTree.

#### *Simulated mock community data with varying error rates across libraries*

To determine the impact of different error rates across libraries on distribution-based clustering performance, simulated mock community was generated using the template sequences for each members added across libraries. The total number of sequences generated was proportional to measured concentration and resulted in the creation of 748,463 total *in silico* reads. The geometric mean (R version 2.12.1; rgeom) was used to create error rates of both 0.9 and 0.8 to simulate high and low quality sequencing runs, respectively. The constant error rate dataset used in Table S5 was 0.9 for all libraries while the variable error rate dataset was 0.90 for 6 libraries and 0.08 for 3 of the libraries.

The geometric mean was used to determine which of the simulated reads would contain errors and how many errors it would contain. This was implemented in R (version 2.12.1) with rgeom using the total read count needed for each sequence and the error rate. For example, if a template was supposed to have 10 reads with an error rate of 0.8, the results would look similar to the following:

```
> rgeom(10,0.8)
[1] 1 0 0 0 0 0 1 4 0 0
```

Where two sequences would have one bp different, one would have four mismatches and seven sequences would have no errors.

After determining how many errors to generate for each read, the position of the errors was also determined in R using the hypergeometric mean (rhyper). The distribution results in either 0 or 1 and depends on the input probability. Starting at the 3' ending position, the hypergeometric mean was used to determine whether to alter the base to another random base (1=alter, 0=evaluate next base). The probability of having an error decreased toward the 5' end to mimic sequence quality being poor at the 3' end. This was repeated until the required number of errors was generated.

Two datasets were generated in this manner. One set had a constant error rate across all libraries, and another had three libraries with a higher error rate. The dataset was clustered using the distribution based clustering algorithm as normal and the results are presented in Table S5.



## Supplementary References

Blackburn MC (2010). Development of New Tools and Applications for High-Throughput Sequencing of Microbiomes in Environmental or Clinical Samples. Master of Science in Chemical Engineering thesis, Massachusetts Institute of Technology, Cambridge, MA.

Lane DJ (1991). 16S/23S rRNA sequencing. In: Stackebrandt E, Goodfellow M (eds). *Nucleic Acid Techniques in Bacterial Systematics*. Wiley & Sons: Chichester. pp 115-175.

## Supplementary Figures

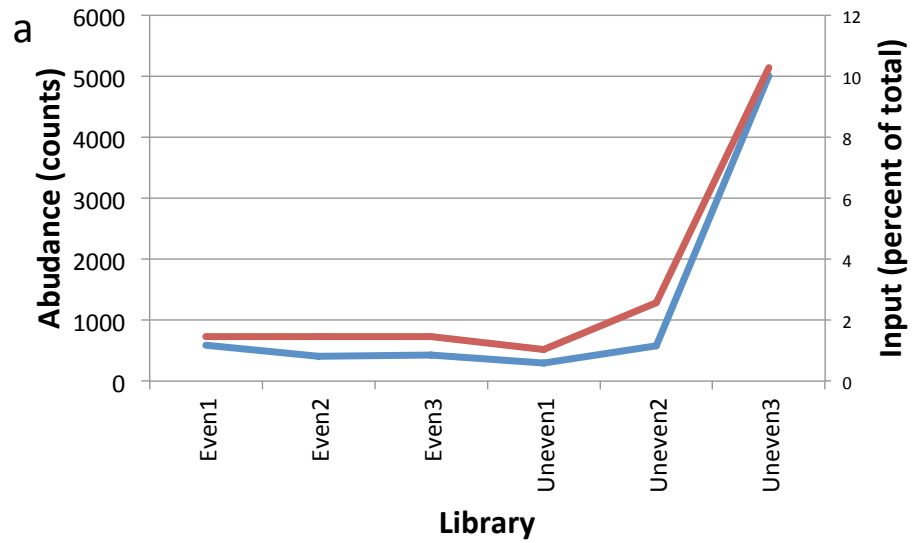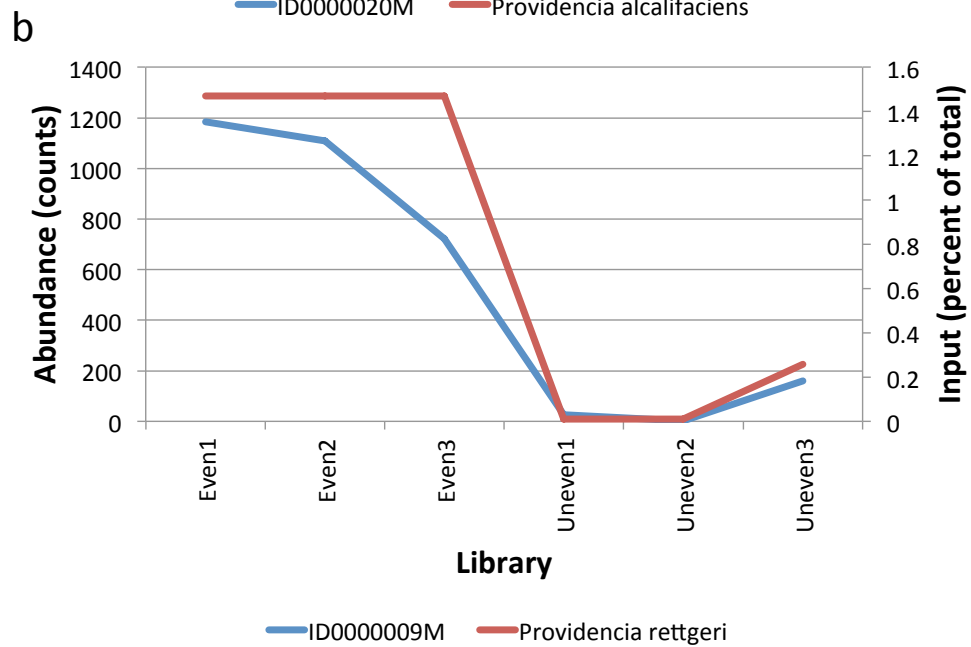

**Figure S1.** Unique distributions across the mock libraries help to identify a mislabeled sequence in the reference dataset. a. The distribution of a sequence matching the reference sequence labeled *Providencia rettgeri* and the input distribution of *Providencia alcalifaciens*. This sequence also matched others strains labeled *Providencia alcalifaciens* in NCBI's nr database. It was changed to *Providencia alcalifaciens*. b.) The distribution of another sequence which corresponds to the correct input of *Providencia rettgeri*. This other sequence also hits many other *Providencia rettgeri* strain in NCBI's nr database. This sequence was included in the analysis as the reference sequence for *Providencia rettgeri*.

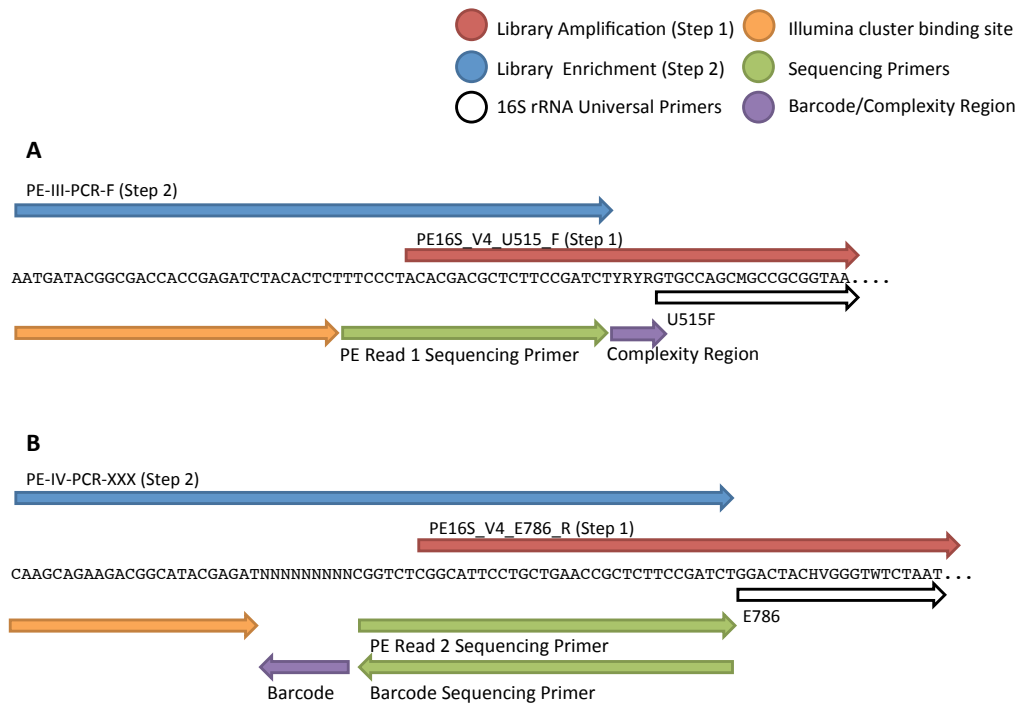

**Figure S2.** 16S rDNA library construct from two-step PCR. a.) 5' end of the Illumina library construct, including both first and second step forward primer sequences and sequencing primers. b.) 3' end of Illumina library construct including barcoded region and first step and second step reverse primers.

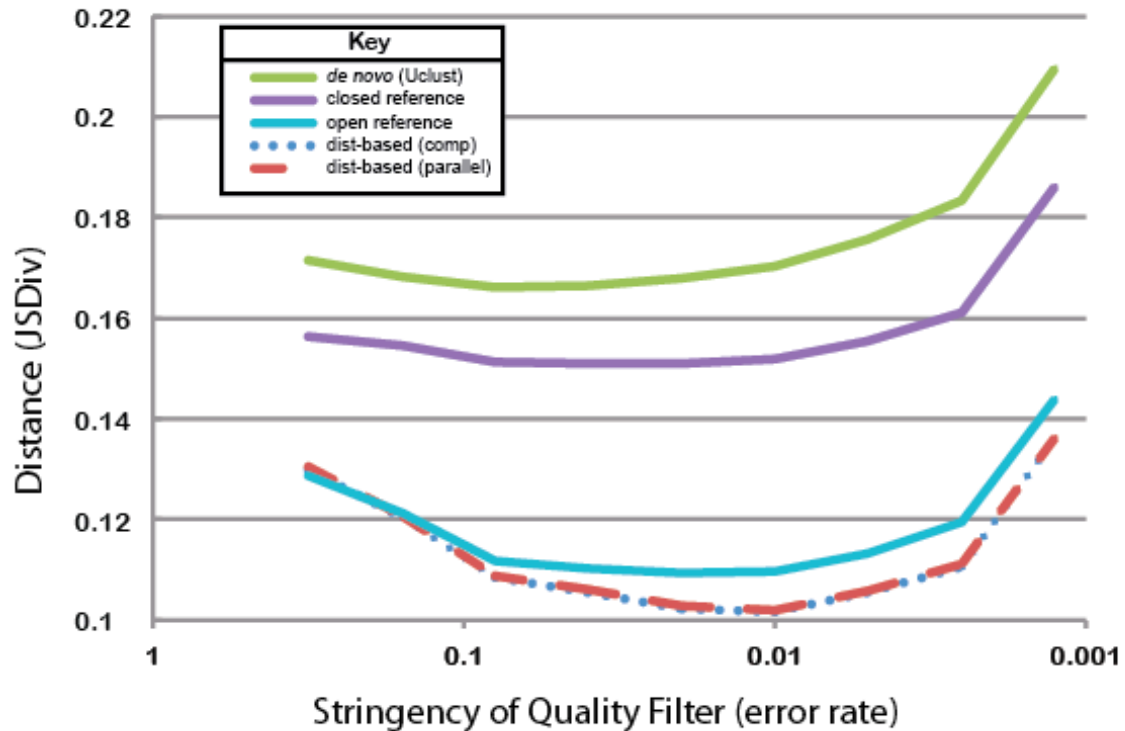

**Figure S3.** Distribution-based clustering results in a distribution of sequences that is most similar to the input distribution. Additionally, an intermediate amount of quality filtering results in a better representation of the input community for all clustering methods. The Jensen-Shannon divergence (JSDiv) is used as a measure of distance between the input concentration and resulting OTU counts after applying each clustering method at different levels of quality filtering. At the highest error rates, incorrect OTUs add to the distance from the true distribution. At the lowest error rates, the small number of reads kept creates the large distance values. Both parallel and complete distribution-based clustering methods result in OTUs that are most similar to the true distribution at intermediate levels of quality filter stringency.

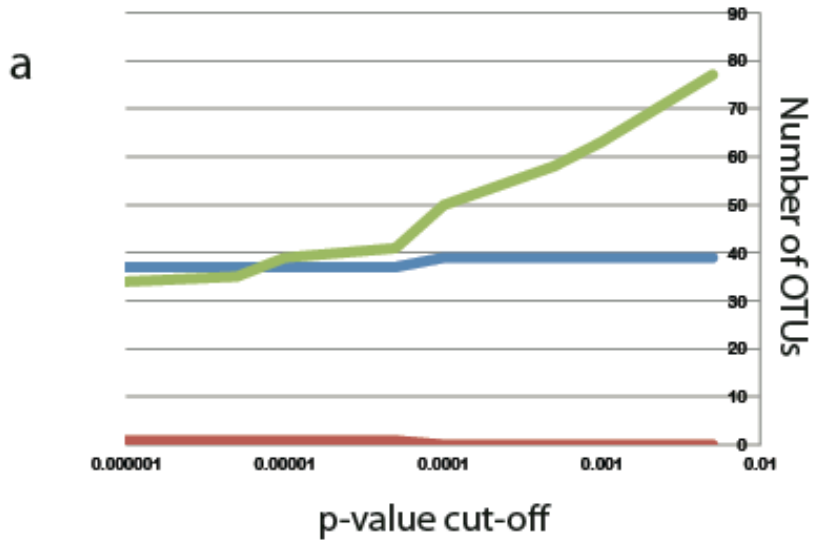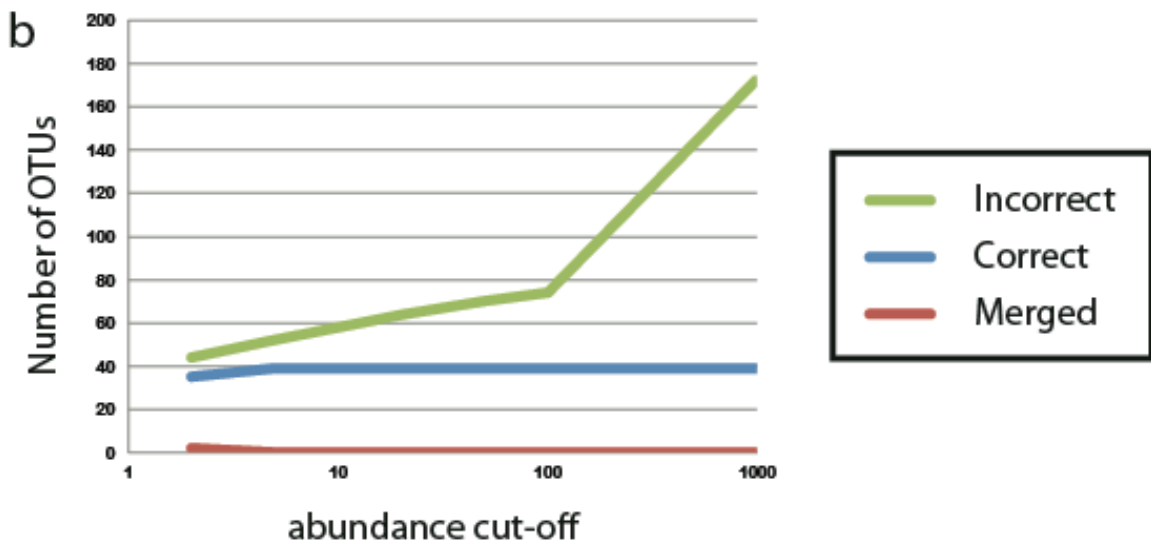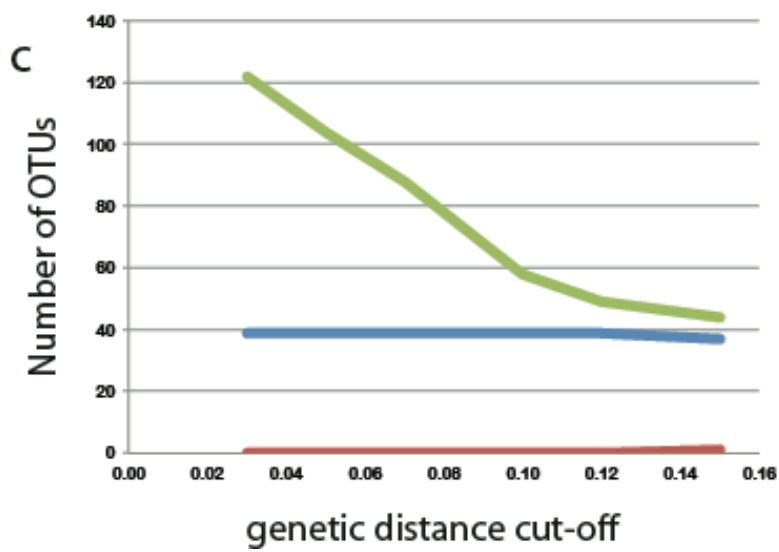

**Figure S4.** Sensitivity of the resulting OTUs to changes in the distribution-based algorithm parameters. a.) Increasing the significance cut-off value of the chi-sq test creates more incorrect OTUs whereas lower p-value cut-offs tend to merge sequences. X- axis in plotted in log scale b.) Decreasing the abundance criteria merges true input sequences with similar distributions, but increasing the cut-off to 10 mainly detects sequencing errors. X-axis is plotted in log scale c.) Lower genetic similarity cutoffs generate more incorrect OTUs, whereas at high genetic cut-off values, some mock community sequences with similar distributions are merged. "Correct" are the number of OTUs containing a single exact match to an input sequence. "Incorrect" are the number of OTUs that do not have any sequences exactly matching the input community. "Merged" are the number of OTUs that contain more than one sequence matching an input sequence.

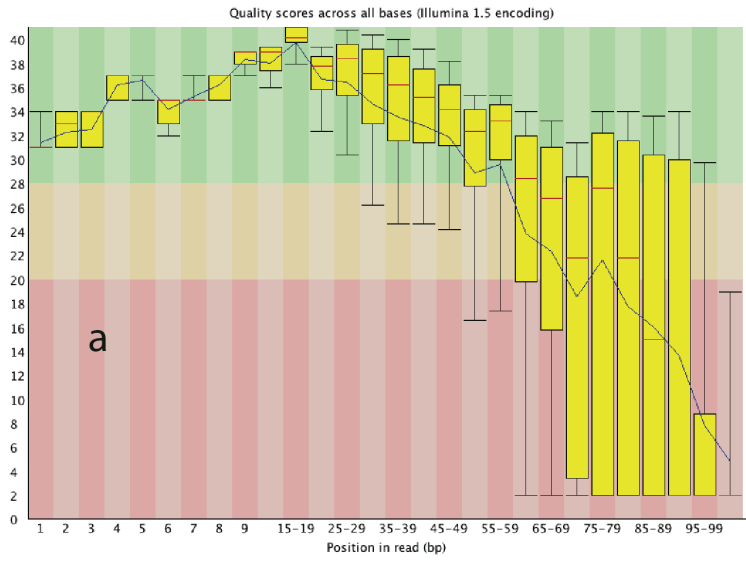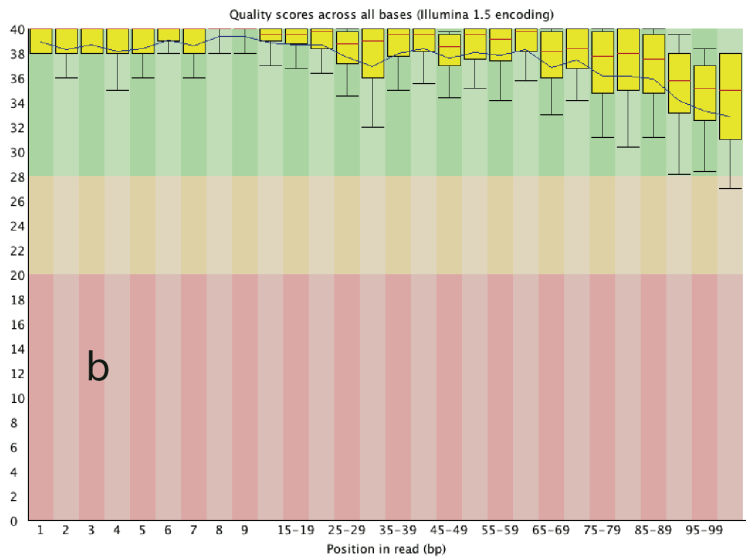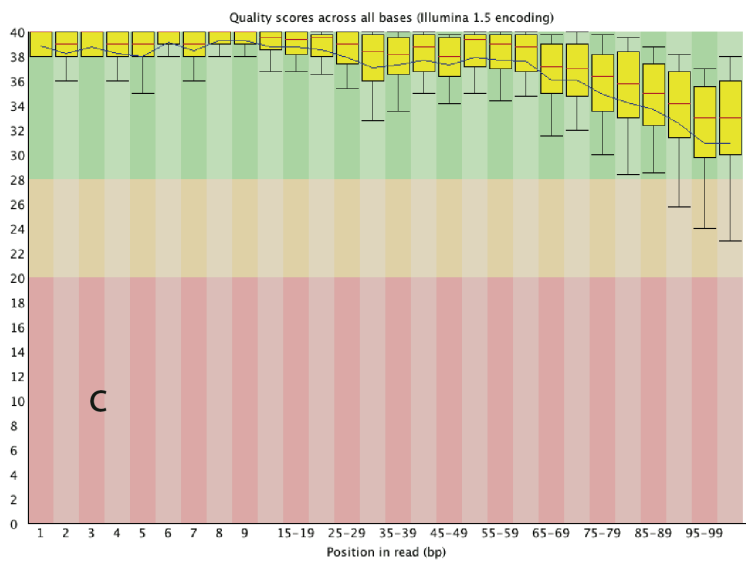

**Figure S5.** Per base quality scores for the three lanes of Illumina. The quality of one set of samples was substantially worse than the others. (a) Flow 1, Lane 1, samples com4-com6 (b) Flow 2, Lane 1, samples com1-com3 (c) Flow 2, Lane 2, samples com7-com9.

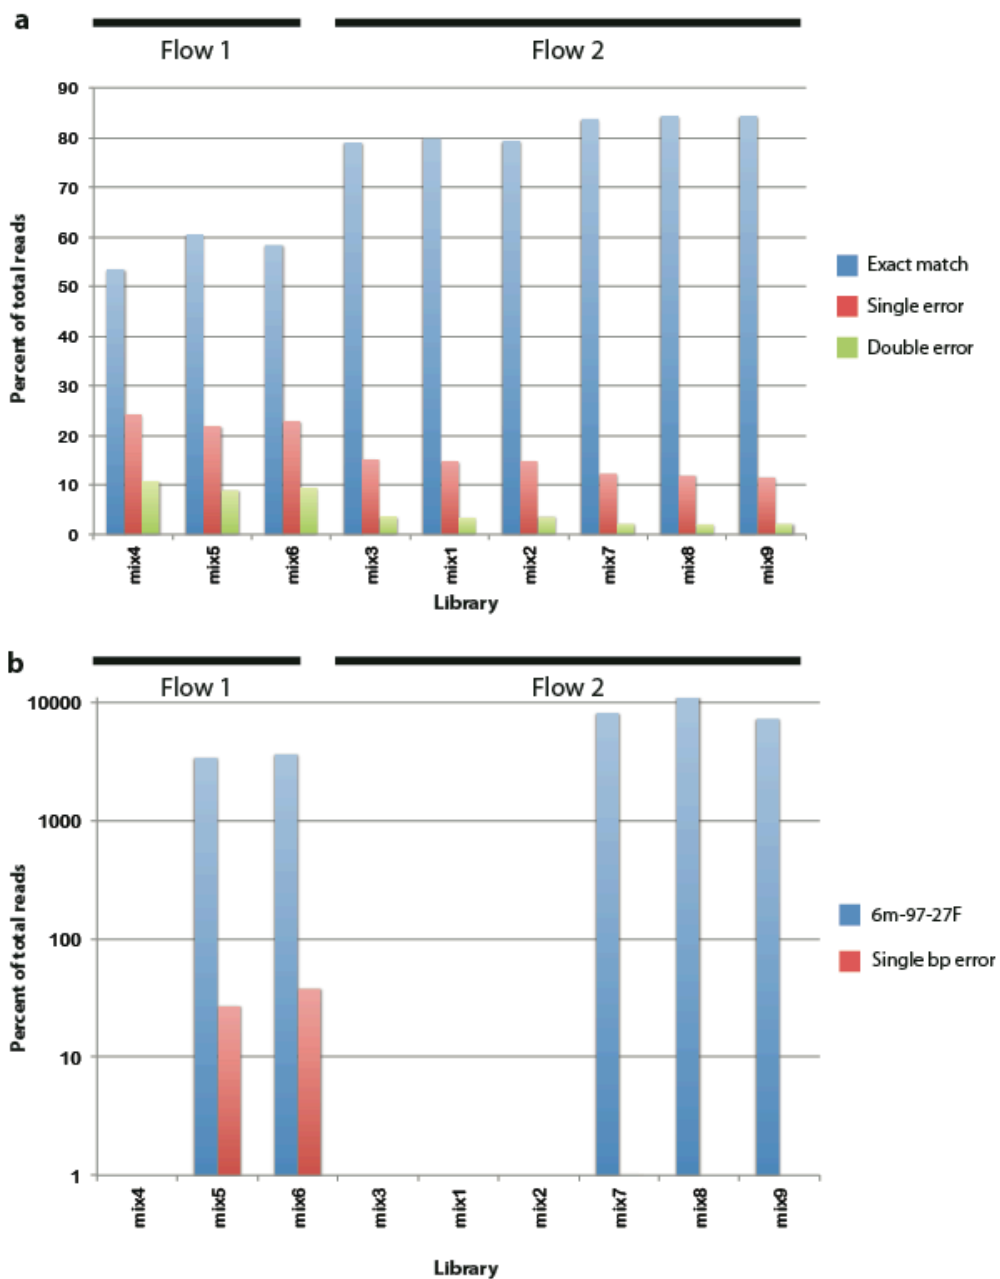

**Figure S6.** Error rates were higher on Flow cell 1 (Flow1) than Flow cell 2 (Flow2) causing non-random distribution of erroneous sequences across samples. (a) Exact match, single base mismatches (single error) and double base mismatches (double



error) as a percent of the total number of raw (not quality filtered) sequences that blast to the entire 76 bp of any mock community member. Samples are labeled with the flow cell number (Flow1 or Flow2) corresponding to two different Illumina runs. Additionally, the corresponding sample name (mix1-9) is labeled on the X-axis.

(b) The distribution of the true sequence (6m-94-27F) and a sequence with a single bp error sequence across samples after quality filtering and clustering. Although the single bp error sequence was generated from the true sequence, it does not have the same distribution across samples because of the difference in error rates across flow cells. Y-axis is log scale.

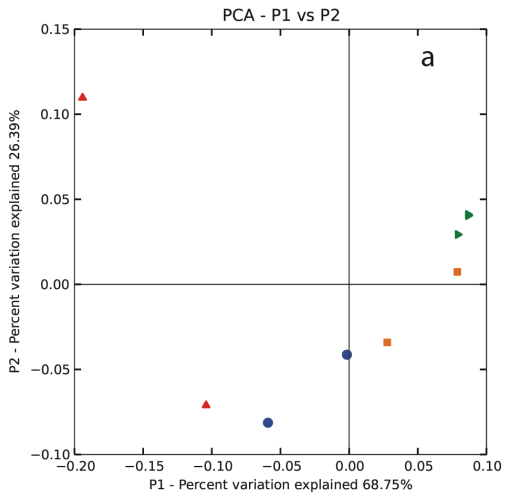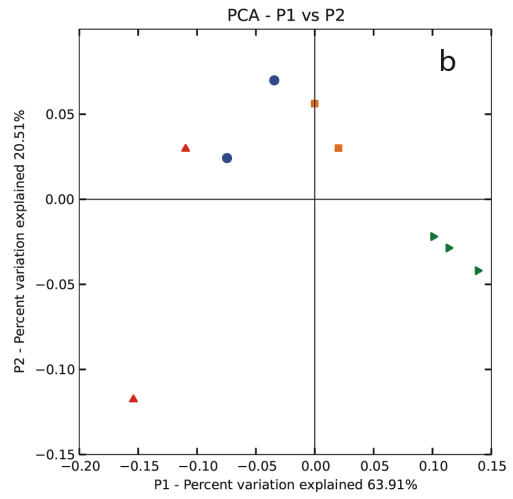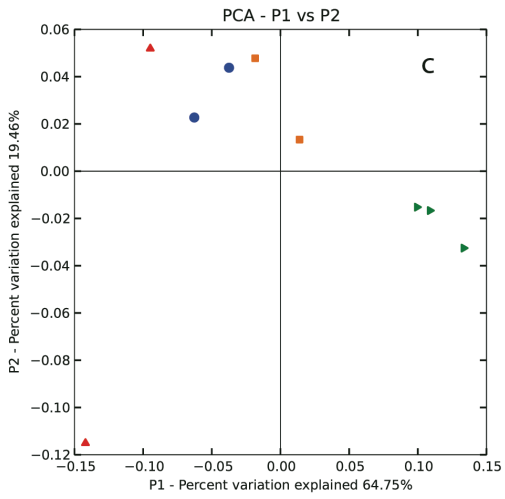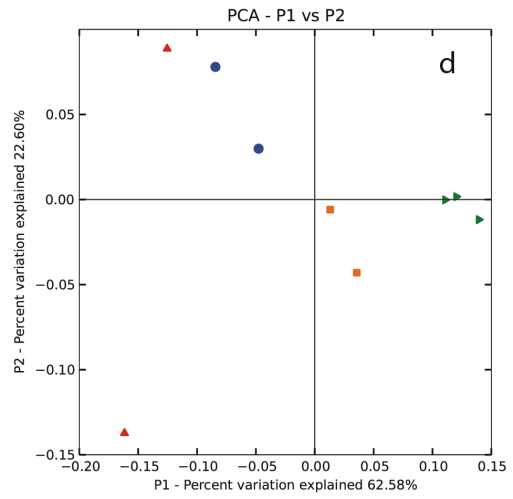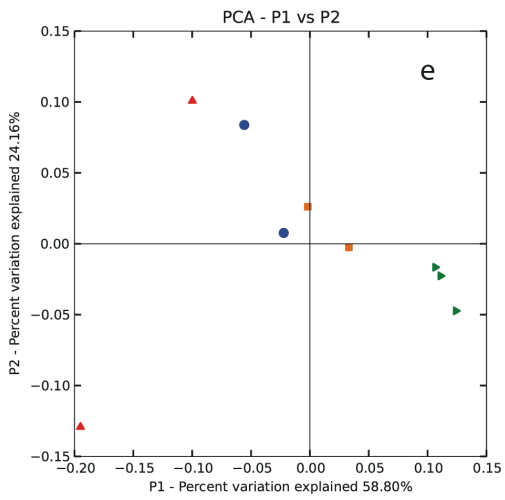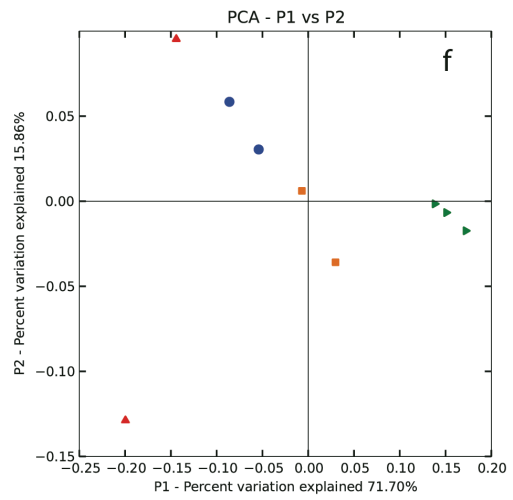

**Figure S7.** Principal components analysis of mock community libraries com1-com9. The primary (P1) and secondary (P2) components are plotted for the (a) true input community and for each clustering method: (b) distribution-based clustering, complete; (c) distribution-based clustering, parallel; (d) *de novo*, usearch; (e) open-reference clustering; (f) closed-reference clustering. Samples are colored according to the total number of input sequences: 1-10 input sequences, red triangle; 11-20, blue circle; 21-30 orange square; 31-40 green triangle.

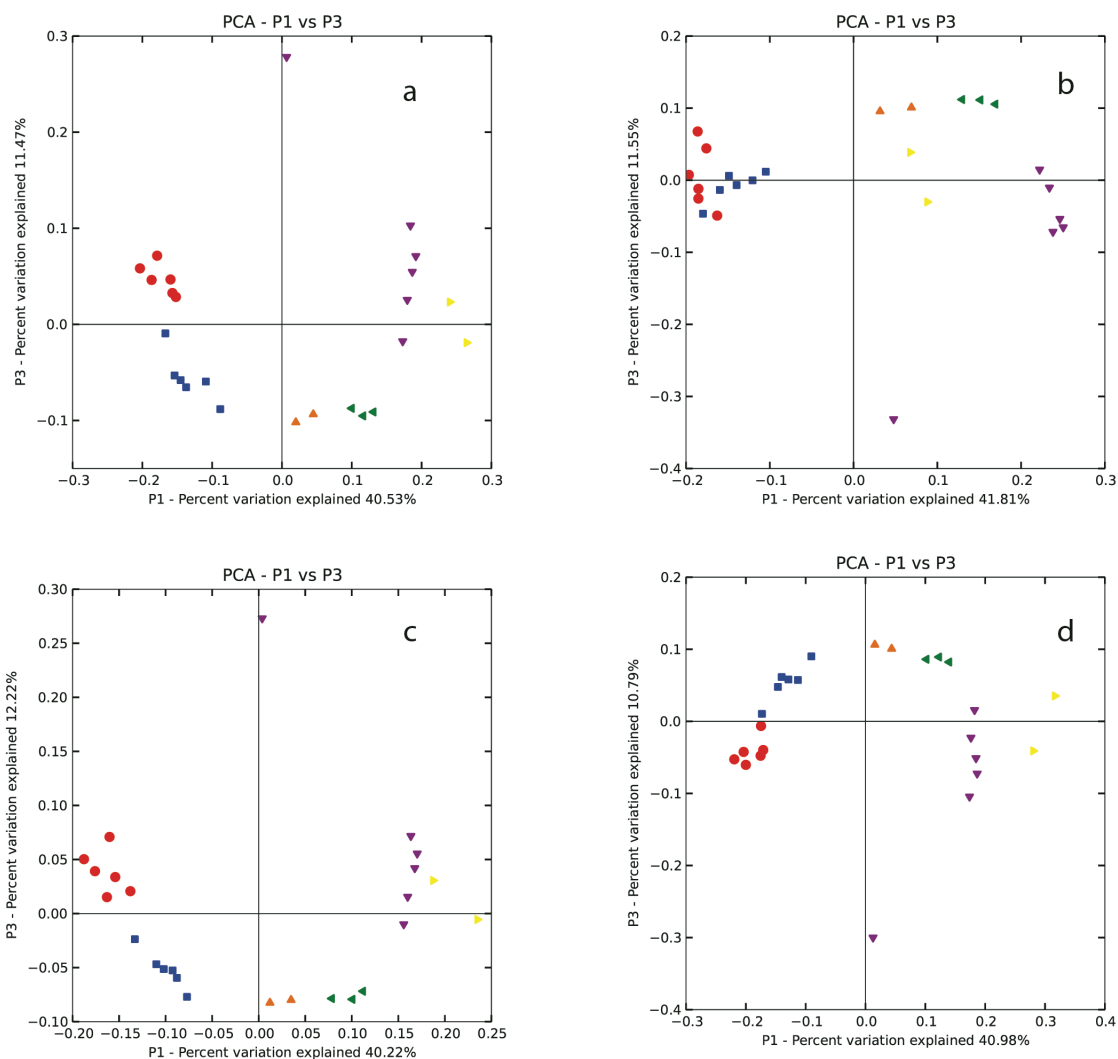

**Figure S8.** Principal components analysis of environmental samples from a stratified lake is similar across clustering algorithms. The primary (P1) and tertiary (P3) components are plotted for (a) distribution-based clustering, (b) *de novo* (USEARCH), (c) closed-reference and (d) open-reference clustering. Samples are colored according to depth: surface to 5 meters (m) depth, red circles; 6-10 m, blue square; 11-12 orange triangle; 13-15 m, green triangle; 16-22 m, purple triangle; surface and end blank, yellow triangle.

## Supplementary Tables

Table S1. Mock community template concentrations and primer mismatches

| Name       | Set no. | Added to libs. <sup>1</sup> | Concentration (pg/ul) | Notes                                                                                           |
|------------|---------|-----------------------------|-----------------------|-------------------------------------------------------------------------------------------------|
| 21m-94-27F | 1       | com1-com9                   | 22.67                 | NA                                                                                              |
| 6m-05-27F  | 1       | com1-com9                   | 4.9                   | NA                                                                                              |
| 6m-16-27F  | 1       | com1-com9                   | 1.988                 | NA                                                                                              |
| 6m-10-27F  | 1       | com1-com9                   | 26.36                 | NA                                                                                              |
| 21m-66-27F | 1       | com1-com9                   | 38.07                 | 2 mismatches 8 and 9 bp from 3' end of F primer                                                 |
| 21m-32-27F | 2       | com2-com9                   | 60.4875               | NA                                                                                              |
| 6m-09-27F  | 2       | com2-com9                   | 7.5625                | NA                                                                                              |
| 6m-44-27F  | 2       | com2-com9                   | 6.95                  | 1 mismatch 1 bp from 3' end of F primer                                                         |
| 6m-06-27F  | 2       | com2-com9                   | 17.6875               | NA                                                                                              |
| 21m-41-27F | 2       | com2-com9                   | 39.5625               | An additional 21.575 pg/ul of 21m-41 was added to com7, com8 and com9 as a mislabeled template. |
| 6m-80-27F  | 3       | com3-com9                   | 8.0735                | 1 mismatch 13 bp from 3' end of the R primer                                                    |
| 21m-90-27F | 3       | com3-com9                   | 1.77                  | 1 bp mismatch 9 bps from 3' end of F primer                                                     |
| 6m-70-27F  | 3       | com3-com9                   | 1.99875               | NA                                                                                              |
| 6m-89-27F  | 3       | com3-com9                   | 28.85                 | NA                                                                                              |
| 21m-02-27F | 4       | com4-com9                   | 1.6525                | 2 bp mismatch 8 and 9 bp from 3' end of F primer                                                |
| 6m-22-27F  | 4       | com4-com9                   | 19                    | NA                                                                                              |
| 6m-69-27F  | 4       | com4-com9                   | 8.625                 | NA                                                                                              |
| 6m-50-27F  | 4       | com4-com9                   | 47.825                | NA                                                                                              |
| 21m-83-27F | 4       | com4-com9                   | 56.05                 | 1 mismatch 14 bp from 3' end R primer                                                           |
| 6m-94-27F  | 5       | com5-com9                   | 59.775                | NA                                                                                              |
| 21m-25-27F | 5       | com5-com9                   | 19.5                  | NA                                                                                              |
| 21m-29-27F | 5       | com5-com9                   | 38.7875               | NA                                                                                              |
| 21m-05-27F | 5       | com5-com9                   | 10.3375               | NA                                                                                              |
| 6m-86-27F  | 6       | com6-com9                   | 0.60475               | NA                                                                                              |
| 21m-87-27F | 6       | com6-com9                   | 36.2                  | 1 mismatch 7 bp from 3' end of R primer                                                         |
| 6m-65-27F  | 6       | com6-com9                   | 40.3625               | 1 mismatch 1 bp from 3' end F primer                                                            |

|            |   |           |         |                                                          |
|------------|---|-----------|---------|----------------------------------------------------------|
| 21m-61-27F | 6 | com6-com9 | 94.7125 | 4 bps mismatch 12, 8, 7 and 2 bp from 3' end of F primer |
| 6m-04-27F  | 7 | com7-com9 | 3.657   | NA                                                       |
| 21m-54-27F | 7 | com7-com9 | 30      | NA                                                       |
| 6m-20-27F  | 7 | com7-com9 | 17.175  | NA                                                       |
| 6m-40-27F  | 7 | com7-com9 | 26.8625 | NA                                                       |
| 21m-08-27F | 8 | com8-com9 | 0.5205  | 2 mismatch 8 and 9 bp from 3' end of F primer            |
| 6m-81-27F  | 8 | com8-com9 | 40.2875 | NA                                                       |
| 6m-13-27F  | 8 | com8-com9 | 26.1625 | NA                                                       |
| 6m-52-27F  | 8 | com8-com9 | 1.2065  | NA                                                       |
| 6m-75-27F  | 9 | com9      | 16.675  | NA                                                       |
| 6m-82-27F  | 9 | com9      | 22.675  | NA                                                       |
| 21m-68-27F | 9 | com9      | 13.875  | NA                                                       |
| 6m-19-27F  | 9 | com9      | 8.85    | NA                                                       |
| 6m-87-27F  | 9 | com9      | 0.8125  | NA                                                       |

<sup>1</sup> Samples were added to libraries in sequential order, starting with com1 and ending with com9. If a set was added to com1, it was also added to all subsequent libraries com2 through com9.



Table S3. Barcode sequences and sequencing outline

| <b>Sample ID</b> | <b>Barcode Sequence</b> | <b>Description</b>   | <b>Flow cell No.</b> | <b>Lane No.</b> | <b>Diversity</b> |
|------------------|-------------------------|----------------------|----------------------|-----------------|------------------|
| com1             | CGAATAT                 | E8, plate<br>63umP2  | 1                    | 1               |                  |
| com2             | AAGGAAC                 | E9, plate<br>63umP2  | 1                    | 1               |                  |
| com3             | GATTGAA                 | E10, plate<br>63umP2 | 1                    | 1               |                  |
| com4             | CCGCACC                 | H1, plate<br>63umP1  | 2                    | 1               |                  |
| com5             | ATGCCAG                 | H2, plate<br>63umP1  | 2                    | 1               |                  |
| com6             | TCGAACA                 | H3, plate<br>63umP1  | 2                    | 1               |                  |
| com7             | GTACGTT                 | H10, plate<br>63umP3 | 1                    | 2               |                  |
| com8             | AGTAGAT                 | H11, plate<br>63umP3 | 1                    | 2               |                  |
| com9             | TCATTAA                 | H12, plate<br>63umP3 | 1                    | 2               |                  |



Table S4. Correlation of OTUs from various clustering methods with matching Sanger environmental clone sequence

| Sanger Clone       | USEARCH correlation | Open-reference correlation | Closed-reference correlation | DBC correlation |
|--------------------|---------------------|----------------------------|------------------------------|-----------------|
| 21m-02-27F         | 0.999831867         | 0.988437304                | NA                           | NA              |
| 21m-03-27F         | 0.999999465         | 0.999768514                | 0.999768514                  | 0.999953024     |
| 21m-04-27F         | 0.982567028         | 0.999991003                | 0.999991003                  | 0.999968253     |
| 21m-05-27F         | 0.99998637          | 0.999952053                | NA                           | 0.999967953     |
| 21m-08-27F         | 0.998120162         | 0.996556495                | NA                           | 0.999521037     |
| 21m-09-27F         | 0.999922215         | 0.999952171                | 0.999952171                  | 0.999858585     |
| 21m-11-27F         | 0.997205609         | 0.994006215                | NA                           | 0.947095652     |
| 21m-13-27F         | 0.999971592         | 0.999971592                | 0.999971592                  | 0.999973636     |
| 21m-14-27F         | NA                  | NA                         | NA                           | NA              |
| 21m-22-27F         | 0.999999929         | 0.999995556                | 0.999995763                  | 0.999993992     |
| 21m-24-27F         | 0.999936853         | 0.999945906                | NA                           | 0.999948108     |
| 21m-29-27F         | 0.999999379         | 0.999996912                | 0.999996912                  | 0.999995608     |
| 21m-30-27F         | 0.999044469         | 0.999185914                | NA                           | 0.99998369      |
| 21m-31-27F         | 0.999999836         | 0.999997084                | 0.999997084                  | 0.999997146     |
| 21m-32-27F         | 0.999995376         | 0.999458687                | 0.999458687                  | 0.999969546     |
| 21m-36-27F         | 0.999999722         | 0.999964949                | NA                           | 0.999955969     |
| 21m-40-27F         | 0.999999988         | 0.999998671                | 0.999998649                  | 0.99999804      |
| 21m-41-27F         | NA                  | 0.997646314                | 0.997646314                  | 0.999758171     |
| 21m-45-27F         | 0.999999156         | NA                         | NA                           | 0.99995629      |
| 21m-48-27F         | 0.976110722         | 1                          | 0.99750752                   | 0.976621605     |
| 21m-49-27F         | 0.999982722         | NA                         | NA                           | 0.999980964     |
| 21m-52-27F         | NA                  | NA                         | NA                           | 0.999698894     |
| 21m-60-27F         | 0.999999952         | 0.998506324                | 0.998504326                  | 0.999990881     |
| <b>21m-63-27F*</b> | <b>0.880625476</b>  | <b>0.825360924</b>         | <b>0.822861822</b>           | 0.990520344     |
| 21m-65-27F         | 0.986325434         | 0.999990787                | 0.999990787                  | 0.999895439     |
| 21m-66-27F         | NA                  | NA                         | NA                           | NA              |
| 21m-67-27F         | 0.999999957         | 0.99999697                 | 0.999996992                  | 0.999966109     |
| 21m-68-27F         | 0.99999981          | 0.99998327                 | NA                           | 0.999983149     |
| 21m-70-27F         | 0.999999359         | 0.999996268                | 0.999996268                  | 0.999991529     |
| 21m-71-27F         | 0.99985004          | 0.999995199                | 0.999995199                  | 0.999771713     |
| 21m-72-27F         | 0.99999655          | 0.996681307                | NA                           | 0.999996955     |
| 21m-76-27F         | 0.999999988         | 0.999998354                | 0.999998363                  | 0.999996232     |
| 21m-81-27F         | 0.999999928         | 0.999987794                | 0.999986911                  | 0.999978358     |
| 21m-82-27F         | NA                  | 0.999832758                | 0.999832758                  | 0.999819939     |
| 21m-83-27F         | 0.999579834         | 0.999993462                | 0.999993667                  | 0.99995589      |
| 21m-84-27F         | 0.999999816         | 0.999986865                | 0.999986865                  | 0.999983076     |
| <b>21m-85-27F</b>  | <b>0.850149712</b>  | 0.999982378                | 0.999981951                  | 0.999993487     |

|                  |                    |                    |                    |             |
|------------------|--------------------|--------------------|--------------------|-------------|
| 21m-86-27F       | NA                 | 0.99682474         | 0.99682474         | 0.999970848 |
| 21m-87-27F       | 0.999999946        | 0.999459162        | 0.999459488        | 0.999991363 |
| 21m-91-27F       | 0.999999143        | 0.999733801        | 0.999734327        | 0.999997782 |
| 21m-92-27F       | 0.999999993        | 0.99999712         | 0.999997098        | 0.999997873 |
| 21m-94-27F       | 0.999965615        | 0.999878505        | 0.999876502        | 0.999574867 |
| 6m-02-27F        | 0.948124255        | 0.999886989        | 0.999886989        | 0.999973135 |
| 6m-04-27F        | 0.9999997          | 0.999993308        | 0.999993308        | 0.999993803 |
| 6m-05-27F        | 0.999999809        | 0.999973188        | 0.999973188        | 0.999969356 |
| 6m-06-27F        | 0.999999945        | 0.99999637         | 0.999996606        | 0.999994691 |
| 6m-09-27F        | 0.999999932        | 0.999996944        | 0.999996945        | 0.99999668  |
| 6m-10-27F        | 0.999700326        | 0.999044474        | 0.999044474        | 0.999762791 |
| 6m-13-27F        | 0.999999965        | 0.999990493        | 0.999990493        | 0.999983703 |
| 6m-14-27F        | 0.999999946        | 0.999995685        | 0.999995721        | 0.999993595 |
| 6m-15-27F        | 0.962483452        | 0.999985389        | 0.9999855          | 0.999964317 |
| 6m-16-27F        | 0.99999992         | 0.999903105        | NA                 | 0.999982484 |
| 6m-17-27F        | 0.999991884        | 0.999662611        | 0.999662787        | 0.999992086 |
| 6m-19-27F        | 0.999999916        | 0.999959879        | 0.999959486        | 0.999940495 |
| 6m-22-27F        | 0.97744411         | 0.998862541        | 0.998893941        | 0.999137677 |
| 6m-27-27F        | 0.999999868        | 0.955022707        | 0.955057044        | 0.99998669  |
| 6m-28-27F        | 0.99874705         | 0.99855622         | NA                 | 0.998620463 |
| 6m-29-27F        | 0.999979883        | 0.999973291        | 0.999973291        | 0.999948297 |
| 6m-30-27F        | 0.9999976          | 0.999981418        | 0.999981418        | 0.999970075 |
| 6m-33-27F        | 0.99999998         | 0.999990445        | 0.999990445        | 0.999990895 |
| 6m-34-27F        | 0.999980535        | 0.999999831        | 0.999999125        | 0.999981344 |
| 6m-37-27F        | 0.999999308        | 0.999885815        | 0.999885815        | 0.99989468  |
| 6m-39-27F        | 0.903636547        | 0.99999425         | 0.999994191        | 0.999996968 |
| 6m-40-27F        | 0.999999319        | 0.999995966        | 0.999995966        | 0.999992703 |
| 6m-41-27F        | 0.999713983        | 0.999604776        | 0.999604776        | 0.999953389 |
| 6m-43-27F        | 0.99996984         | 0.999970768        | 0.999970768        | 0.999972493 |
| <b>6m-44-27F</b> | <b>0.881376523</b> | 0.999989511        | 0.999989511        | 0.999989323 |
| 6m-50-27F        | NA                 | 0.999867733        | 0.999867733        | 0.999823275 |
| 6m-51-27F        | 0.999999964        | 0.999966258        | NA                 | 0.999981791 |
| 6m-53-27F        | 0.999999969        | 0.999970441        | 0.999971235        | 0.999986506 |
| <b>6m-56-27F</b> | <b>0.829520279</b> | 0.999994788        | 0.999994778        | 0.999974311 |
| 6m-58-27F        | 0.999999702        | 0.999985723        | 0.999985723        | 0.999985641 |
| 6m-59-27F        | 0.999999212        | 0.999929601        | 0.99992735         | 0.999918721 |
| 6m-63-27F        | 0.99998016         | 0.999983384        | 0.999983384        | 0.999920585 |
| <b>6m-64-27F</b> | 0.999999372        | <b>0.789783151</b> | <b>0.789950812</b> | 0.999990593 |
| 6m-65-27F        | 0.999999759        | 0.999915811        | 0.999915811        | 0.99995473  |
| <b>6m-66-27F</b> | <b>0.877146275</b> | <b>0.845708551</b> | <b>0.845780711</b> | 0.999983645 |
| 6m-70-27F        | 0.999999199        | 0.999989507        | 0.999989513        | 0.999999429 |
| 6m-74-27F        | 0.999994474        | 0.997338006        | NA                 | 0.999741203 |

|           |             |             |             |             |
|-----------|-------------|-------------|-------------|-------------|
| 6m-75-27F | 0.99998019  | 0.999686327 | 0.999686327 | 0.996771341 |
| 6m-77-27F | 0.999998362 | 0.999985919 | 0.999986018 | 0.999986266 |
| 6m-79-27F | 0.998191658 | 0.999811502 | 0.999811502 | 0.999399639 |
| 6m-81-27F | 0.999999983 | 0.999999171 | 0.999999173 | 0.999997648 |
| 6m-83-27F | NA          | 0.999699594 | 0.999699594 | 0.99972764  |
| 6m-84-27F | 0.999999864 | 0.99999772  | NA          | 0.999997007 |
| 6m-85-27F | 0.99999995  | 0.999989398 | 0.999989355 | 0.999996201 |
| 6m-87-27F | 0.999999702 | NA          | NA          | 0.999977672 |
| 6m-91-27F | 0.99999992  | NA          | NA          | 0.999987023 |
| 6m-94-27F | 0.999931904 | 0.999929312 | 0.999929312 | 0.999935375 |

\* Clone names and the corresponding correlations below 0.9 are in bold

Table S5. Correct and incorrect OTUs predicted by distribution-based clustering on simulated data

| <b>Dataset</b>                   | <b>Correct OTUs</b> | <b>Incorrect OTUs</b> |
|----------------------------------|---------------------|-----------------------|
| Constant error rate <sup>1</sup> | 40                  | 3                     |
| Variable error rate <sup>2</sup> | 40                  | 157                   |

<sup>1</sup> Error rate generated from a geometric distribution was 0.9 for 9 libraries

<sup>2</sup> Error rate was 0.8 across 3 libraries and 0.9 across 6 libraries
